# Supplementary material
Source: publisher site journal article supplement (https://kjim.org/upload/media/kjim-2024-015-Supplementary-Table-2.pdf)
Supplement: Supplementary file 1 [file kjim-2024-015-Supplementary-Table-2.pdf]

**Supplementary Table 2. Association between estimated pulse wave velocity and prevalence of metabolic syndrome**

| ePWV (m/s)        | Prevalence <sup>a)</sup> | Unadjusted OR (95% CI) | Model 1 <sup>b)</sup>  | Model 2 <sup>c)</sup> | Model 3 <sup>d)</sup> |
|-------------------|--------------------------|------------------------|------------------------|-----------------------|-----------------------|
| Cut-off value     |                          |                        |                        |                       |                       |
| ≤ 8.240           | 621/4,496 (13.8%)        | Reference              | Reference              | Reference             | Reference             |
| > 8.240           | 2,317/5,226 (44.3%)      | 4.970 (4.494–5.497)    | 6.426 (5.613–7.357)    | 2.389 (2.002–2.851)   | 2.374 (2.043–2.757)   |
| Tertiles of score |                          |                        |                        |                       |                       |
| Tertile 1         | 314/3,241 (9.7%)         | Reference              | Reference              | Reference             | Reference             |
| Tertile 2         | 1,054/3,243 (32.5%)      | 4.488 (3.911–5.151)    | 6.470 (5.570–7.516)    | 2.745 (2.320–3.248)   | 2.787 (2.304–3.372)   |
| Tertile 3         | 1,570/3,238 (48.5%)      | 8.774 (7.664–10.045)   | 20.497 (16.763–25.064) | 3.941 (3.192–4.865)   | 4.075 (2.990–5.553)   |

ePWV, estimated pulse wave velocity; OR, odds ratio; CI, confidence interval.

<sup>a)</sup>Total prevalence of metabolic syndrome: 2,938/9,722 (30.2%).

<sup>b)</sup>Model 1: Adjustment for age (per 1-year) and sex.

<sup>c)</sup>Model 2: Adjustment for age, sex, systolic blood pressure (per 1-mmHg), body mass index, smoking status, alcohol consumption, physical activity (per 1 METs-hour/wk), income level, and education.

<sup>d)</sup>Model 3: Adjustment for age, sex, systolic blood pressure (per 1-mmHg), body mass index, smoking status, alcohol status, physical activity (per 1 METs-hour/wk), income level, education, hypertension, diabetes mellitus, dyslipidemia, and chronic kidney disease.
